# Supplementary material for: Evolution-Based Functional Decomposition of Proteins
Source: PubMed Central journal article supplement (PMC4890866; doi:10.1371/journal.pcbi.1004817), 2016-06-02
Supplement: pcbi.1004817.s009.pdf [file pcbi.1004817.s009.pdf]

## S5 Figure. Independent components of the G protein family

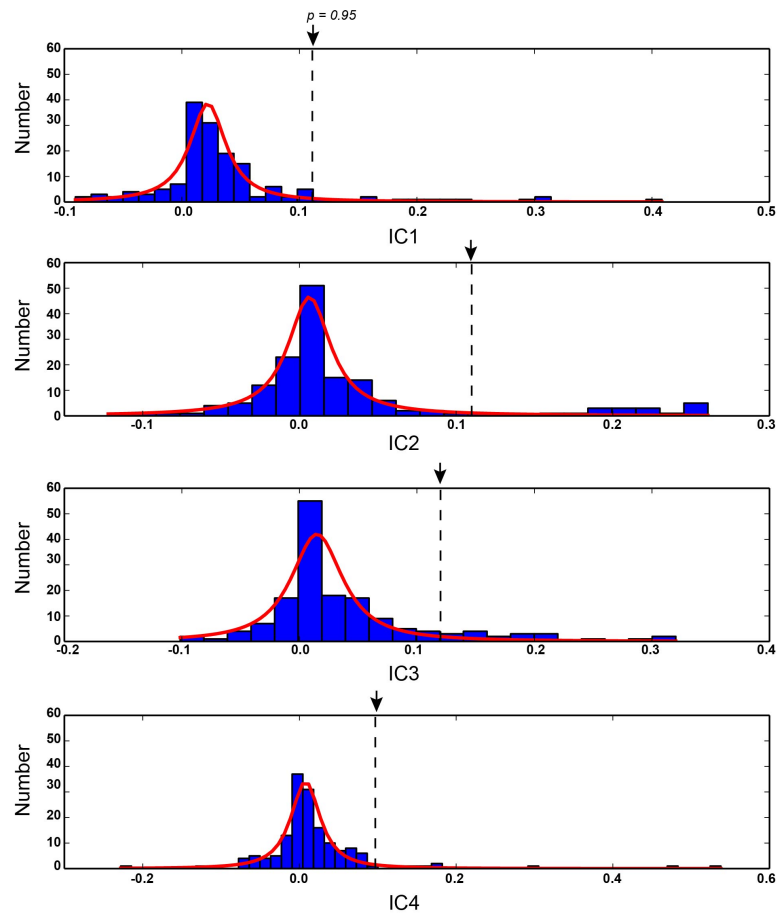

FIG. 5 The independent components (ICs) corresponding to the four top eigenmodes of the  $\tilde{C}_{ij}$  matrix for the **G protein family**. The solid red line is a fit to the t-distribution, with the cutoff indicated representing the top 95% of the cumulative density function. The ICs are generally well-fit by this empirical distribution, and serves as a basis for systematic definition of coevolving positions.
