# Supplementary material for: Evolution-Based Functional Decomposition of Proteins
Source: PubMed Central journal article supplement (PMC4890866; doi:10.1371/journal.pcbi.1004817), 2016-06-02
Supplement: pcbi.1004817.s010.pdf [file pcbi.1004817.s010.pdf]

## S6 Figure. Robustness of the independent components

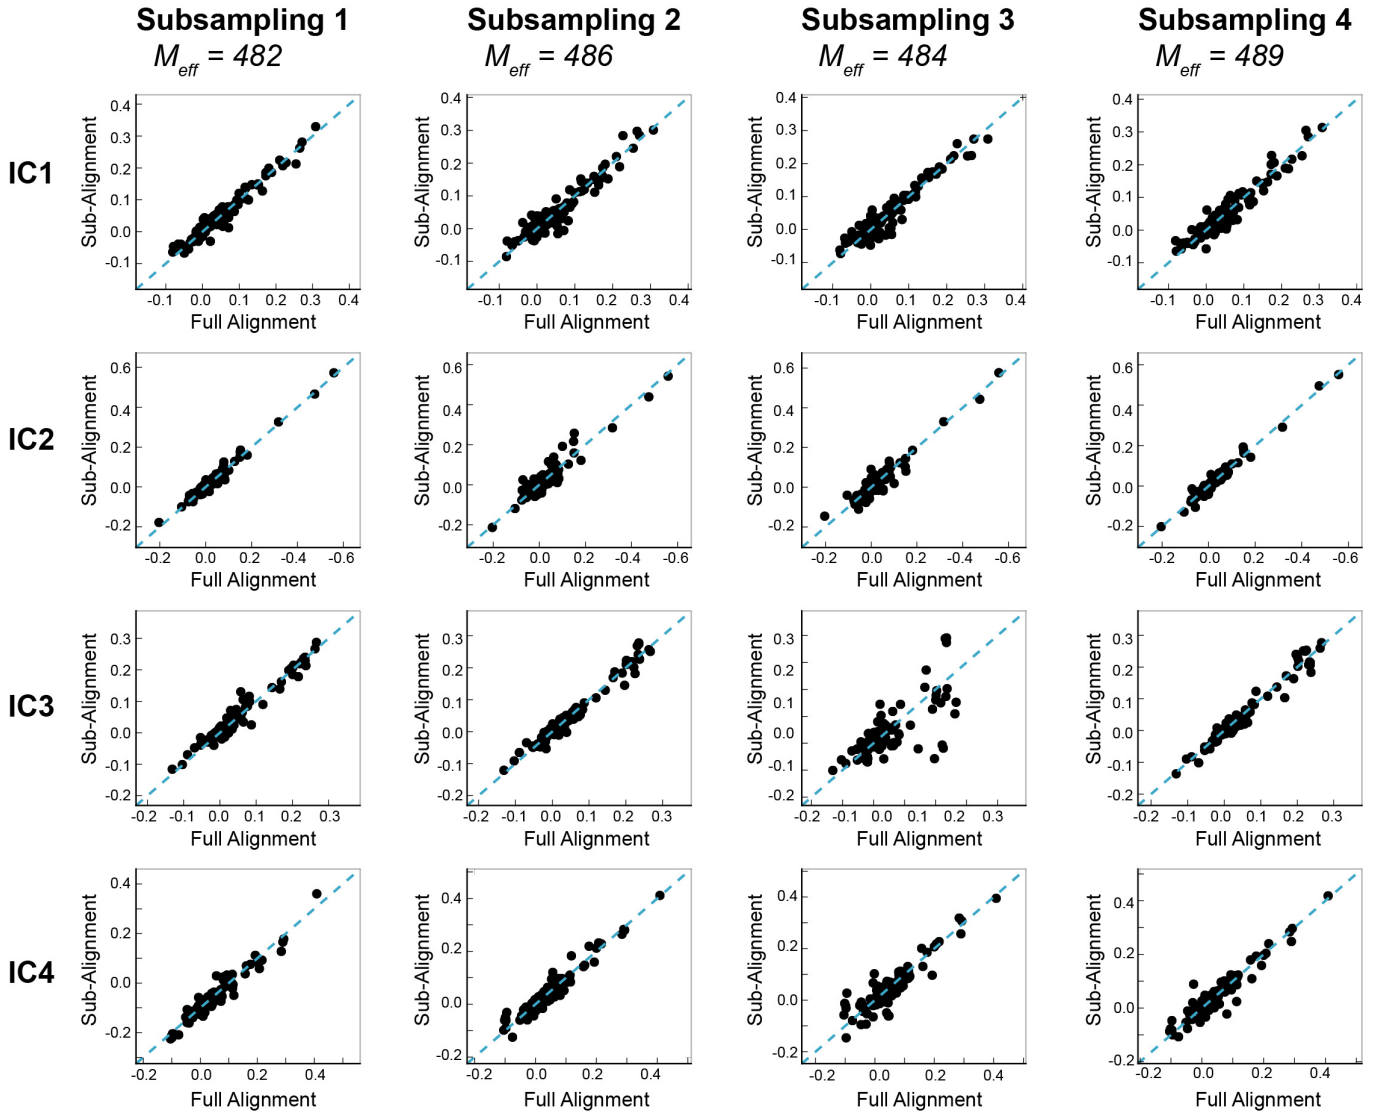

FIG. 6 The robustness of the independent components (ICs) of the  $\tilde{C}_{ij}$  matrix to alignment sub-sampling. Scatterplots of the top four independent components (ICs) for the full alignment of G proteins ( $M_{eff} = 3366$ ) against those for four trials of sub-sampling the alignment to  $\approx 15\%$  of sequences. The analysis shows that the composition of ICs (and therefore sector definitions and sequence projections) are highly robust to the number of effective sequences in the alignment.
