# Supplementary material for: Evolution-Based Functional Decomposition of Proteins
Source: PLOS journal article supplement (doi:10.1371/journal.pcbi.1004817), 2016-06-02
Supplement: S11 (10.1371/journal.pcbi.1004817.s011) [file journal.pcbi.1004817.s011]

## S7 Figure. Sectors in the S1A protein family

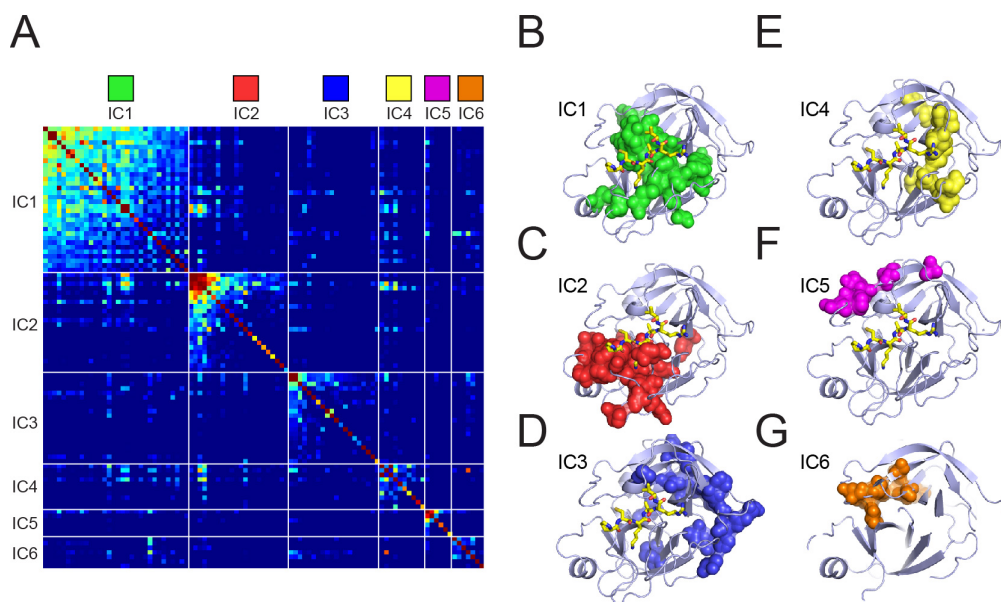

FIG. 7 **Sectors in the S1A protein family.** **A** shows the IC-based sub-matrix of the  $\tilde{C}_{ij}$  matrix for the S1A family and **B-G** shows the positions corresponding to each IC on a representative structure of a member of the protein family (rat trypsin, PDB 3TGI). Each IC shows a hierarchical pattern of correlation between constituent positions, with little compelling evidence for strong inter-IC correlations. Consistent with this, each IC corresponds to a distinct and largely contiguous network of amino acid contacts in the protein structure (**B**). ICs 1-3 correspond to sectors defined in Halabi et al. Cell (2009) 138: 774-86.
